# Supplementary material for: Evolutionary Adaptation of an RNA Bacteriophage to Repeated Freezing and Thawing Cycles
Source: MDPI journal article supplement (doi:10.3390/ijms25094863), 2024-04-29
Supplement: s1 [file s1]

Table S3. Mutations present in the consensus sequences of the virus clones indicated

| Virus clones <sup>1</sup> | Mutations <sup>2</sup> |                                    |                                     |                                                       |                                             |
|---------------------------|------------------------|------------------------------------|-------------------------------------|-------------------------------------------------------|---------------------------------------------|
|                           | Non-coding regions     | A2                                 | CP                                  | A1                                                    | Replicase                                   |
| Qβ <sub>Anc</sub> (1)     |                        |                                    |                                     |                                                       |                                             |
| Qβ <sub>Anc</sub> (2)     |                        |                                    |                                     |                                                       |                                             |
| Qβ <sub>Anc</sub> (3)     |                        |                                    |                                     |                                                       | U2972C                                      |
| L1C1                      |                        |                                    | <b>U1665C</b><br>(F107L)            | <b>C2001U</b><br>(L219F)                              | <b>U4001C</b>                               |
| L1C2                      |                        | <b>G1312A</b><br>(V417I)           | <b>U1665C</b><br>(F107L),<br>C1689U | <b>A2187C</b><br>(S281G)                              | <b>U2847C</b><br>(Y165H),<br><b>U4001C</b>  |
| L1C3                      |                        | C420U                              | <b>U1665C</b><br>(F107L)            |                                                       | G3341A,<br><b>U4001C</b>                    |
| L1C4                      |                        |                                    | <b>U1665C</b><br>(F107L)            |                                                       | <b>U4001C</b>                               |
| L2C1                      |                        | U969C,<br><b>G1312A</b><br>(V417I) |                                     | <b>A1930G</b><br>(Q195R)                              |                                             |
| L2C2                      |                        | U192C                              | <b>G1494A</b><br>(V50I)             | <b>A1930G</b><br>(Q195R),<br><b>G2223A</b><br>(V293I) | <b>G2798A</b>                               |
| L2C3                      |                        | <b>G1312A</b><br>(V417I)           |                                     | <b>A1930G</b><br>(Q195R)                              | <b>U2740C</b><br>(M129T)                    |
| L2C4                      |                        | U393C,<br>C1101U                   |                                     | <b>C1953U</b><br>(L203F),<br>C2201U                   |                                             |
| L3C1                      |                        | <b>A1065G</b>                      |                                     | <b>A1930G</b><br>(Q195R)                              | <b>G2468A</b> ,<br>U2951C                   |
| L3C2                      |                        | U354C,<br><b>A1065G</b>            |                                     | <b>A1930G</b><br>(Q195R)                              | <b>G2468A</b> ,<br><b>U2847C</b><br>(Y165H) |
| L3C3                      | A54G                   | <b>A1065G</b>                      |                                     | <b>A1930G</b><br>(Q195R)                              | <b>G2468A</b> ,<br>U3314C                   |
| L3C4                      |                        | A258G,<br><b>A1065G</b>            |                                     | <b>A1930G</b><br>(Q195R)                              | <b>G2468A</b>                               |

<sup>1</sup>The virus clones indicated are described in the section “Isolation of biological clones” of Materials and Methods.

<sup>2</sup>For each mutation, the protein where it is located is indicated. Non synonymous mutations are shown in bold letters and the corresponding amino acid changes are indicated in brackets. Common mutations between clones and the populations from which they were isolated (see Table S2) are shown in blue.
