# Supplementary material for: Evolutionary Adaptation of an RNA Bacteriophage to Repeated Freezing and Thawing Cycles
Source: MDPI journal article supplement (doi:10.3390/ijms25094863), 2024-04-29
Supplement: s1 [file s1]

Table S2. Mutations present in the evolutionary lines indicated

| Mutation <sup>1</sup> | Aa change | Protein   | Evolutionary line <sup>2</sup> |    |    |         |
|-----------------------|-----------|-----------|--------------------------------|----|----|---------|
|                       |           |           | L1                             | L2 | L3 | Control |
| U471C                 | Syn       | A2        | -                              | P  | -  | -       |
| A1065G                | Syn       | A2        | -                              | -  | F  | -       |
| G1312A                | V417I     | A2        | -                              | P  | -  | -       |
| G1494A                | V50I      | CP        | -                              | P  | -  | -       |
| U1665C                | F107L     | CP        | F                              | -  | -  | -       |
| C1760U                | Syn       | A1        | -                              | -  | -  | P       |
| A1930G                | Q195R     | A1        | -                              | P  | F  | F       |
| C2001U                | L219F     | A1        | P                              | -  | -  | -       |
| C2201U                | Syn       | A1        | -                              | -  | -  | P       |
| G2223A                | V293I     | A1        | -                              | P  | -  | P       |
| G2468A                | Syn       | Replicase | -                              | -  | P  | -       |
| G2798A                | Syn       | Replicase | -                              | P  | -  | -       |
| U4001C                | Syn       | Replicase | F                              | -  | -  | -       |

<sup>1</sup>For each mutation the amino acid change and the protein where it is located are indicated. In case that the mutations is synonymous it is indicated with Syn. P denotes polymorphic mutations and F fixed mutations.

<sup>2</sup>The evolutionary lines are described in Materials and Methods (section “Evolution experiment”) and in Figure 1.
