# Supplementary material for: Evolutionary Adaptation of an RNA Bacteriophage to Repeated Freezing and Thawing Cycles
Source: MDPI journal article supplement (doi:10.3390/ijms25094863), 2024-04-29
Supplement: s1 [file s1]

Table S1. Sequence of the complementary primers used to build the Q $\beta$  site-directed mutants

| Mutant                      | Primer sequences <sup>1</sup>                                                                         |
|-----------------------------|-------------------------------------------------------------------------------------------------------|
| Q $\beta$ <sub>G1312A</sub> | 5'TATCTTTTTATTAACCCAACGCATAAAGCGTTGAACTTTGGGTC3'<br>5'GACCCAAAGTTTCAACGCTTTATGCGTTGGGTTAATAAAAAGATA3' |
| Q $\beta$ <sub>G1494A</sub> | 5'GGAGAAGCGTGTTACCATTTCGGTATCTCAGCC3'<br>5'GGCTGAGATACCGAAATGGTAACACGCTTCTCC3'                        |
| Q $\beta$ <sub>U1665C</sub> | 5'CCGATGAGGAACGAGCTCTTGTTTCGTACAGAGCTT3'<br>5'AAGCTCTGTACGAACAAGAGCTCGTTCCTCATCGG3'                   |
| Q $\beta$ <sub>A1930G</sub> | 5'TAATGCTGTTGAACTCCGGCCTCGCGAATTTGATG3'<br>5'CATCAAATTCGCGAGGCCGGAGTTCAACAGCATTAA3'                   |
| Q $\beta$ <sub>C2001U</sub> | 5'CGTGATTGGGATTCTCGGTTTAGTTATACCACGTTCC3'<br>5'GGAACGTGGTATAACTAAACCGAGAATCCCAATCACG3'                |
| Q $\beta$ <sub>G2223A</sub> | 5'TCACGCCGATGGCGTGATAATTGGCTTTTGGC3'<br>5'GCCAAAAGCCAAATTATCACGCCATCGGCGTGA3'                         |

<sup>1</sup>The nucleotide shown in black corresponds to the mutated position to be introduced in the Q $\beta$  genome
